# Supplementary material for: Interventions to Improve Blood Pressure Control Among Socioeconomically Disadvantaged Patients With CKD: Kidney Awareness Registry and Education Pilot Randomized Controlled Trial
Source: PubMed Central journal article supplement — Kidney Med. 2019 Aug 30;1(5):242–52. doi: 10.1016/j.xkme.2019.07.004 (PMC7380406; doi:10.1016/j.xkme.2019.07.004), 2019-08-30
Supplement: mmc1.pdf [file mmc1.pdf]

**Figure S1A: Mean estimated albuminuria values and 95% CI at baseline and one year for each KARE group**

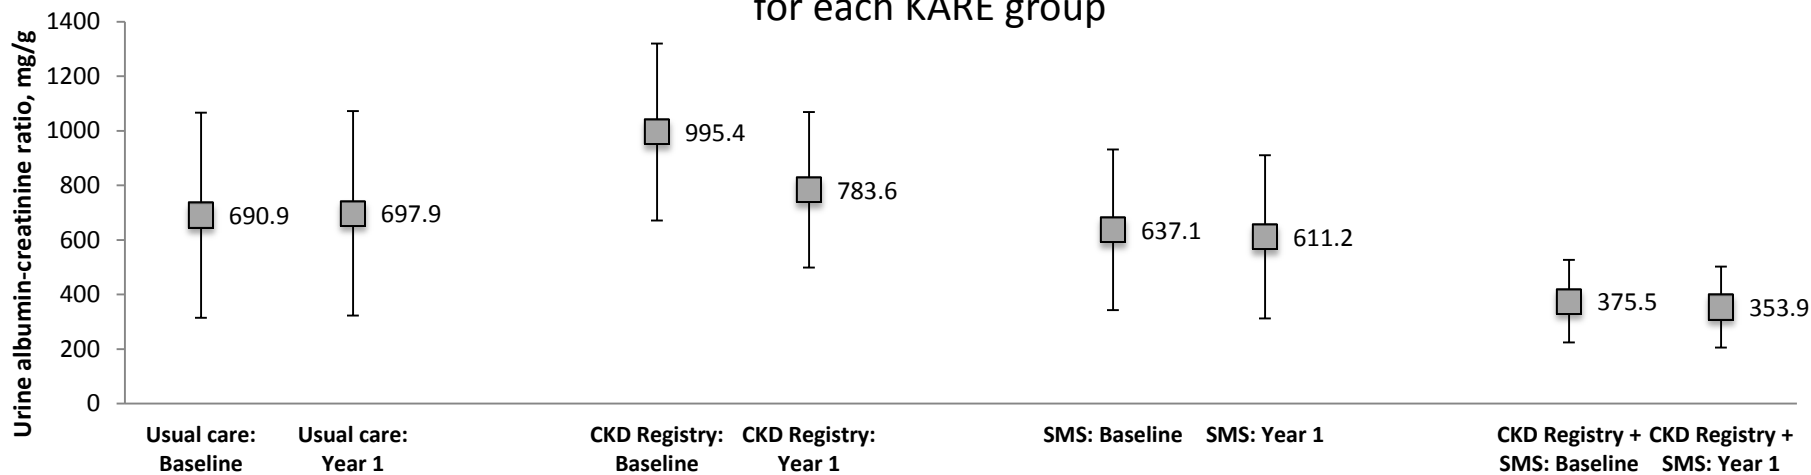

**Figure S1B: Estimated 1-year change in albuminuria values, by baseline SBP control for each KARE group**

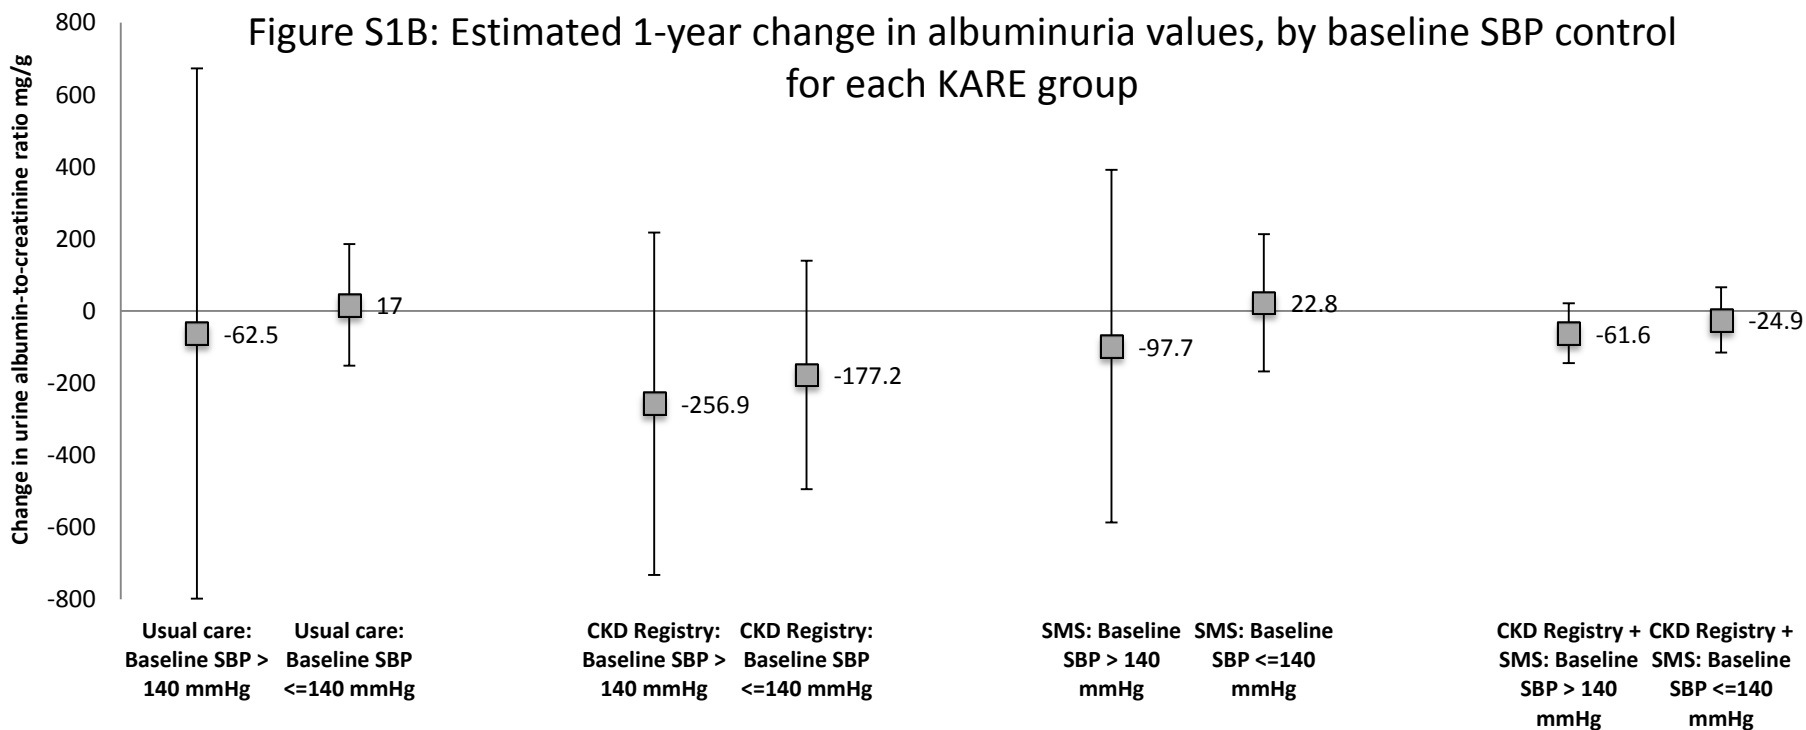

**Table S1: Characteristics of KARE participants with those who declined.**

| <b>Characteristics</b>     | <b>Participants</b> | <b>Decliners</b>  | <b>P-value</b> |
|----------------------------|---------------------|-------------------|----------------|
| N                          | n=137               | n=117             |                |
| Age, median (IQR)          | 58.0 (50.0, 64.0)   | 59.7 (53.1, 67.5) | 0.05           |
| Female gender, n (%)       | 71 (51.8)           | 72 (61.5)         | 0.12           |
| Race/ethnicity, n (%)      |                     |                   | 0.001          |
| Caucasian/white            | 9 (6.6)             | 11 (9.4)          |                |
| Black or African American  | 58 (42.3)           | 47 (40.2)         |                |
| Asian/Pacific Islander     | 20 (14.6)           | 23 (19.7)         |                |
| Hispanic                   | 50 (36.5)           | 25 (21.4)         |                |
| Preferred language, n (%)* |                     |                   | 0.001          |
| English                    | 90 (65.7)           | 87 (77.0)         |                |
| Spanish                    | 40 (29.2)           | 15 (13.3)         |                |
| Cantonese                  | 7 (5.1)             | 11 (9.7)          |                |

\* Preferred language is missing for n=4
